# Supplementary material for: bSUM: A bead-supported unilamellar membrane system facilitating unidirectional insertion of membrane proteins into giant vesicles
Source: PubMed Central journal article supplement — J Gen Physiol. 2016 Jan;147(1):77–93. doi: 10.1085/jgp.201511448 (PMC4692488; doi:10.1085/jgp.201511448), 2016-01
Supplement: supp_jgp.201511448_JGP_201511448_sm.pdf [file supp_jgp.201511448_JGP_201511448_sm.pdf]

Zheng et al., <http://www.jgp.org/cgi/content/full/jgp.201511448/DC1>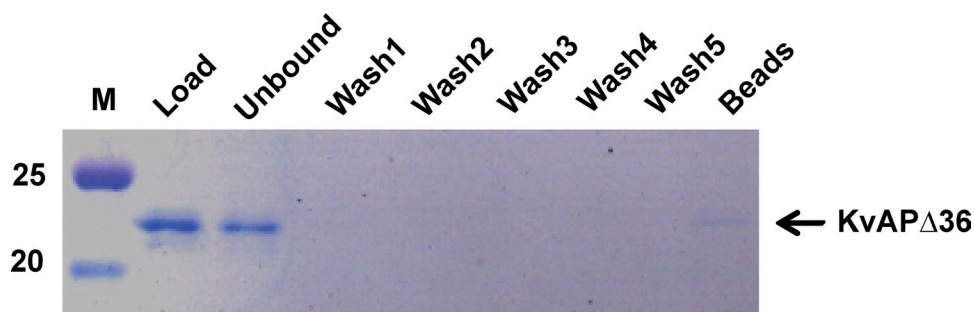

**Figure S1.** Tracking the channel protein during the preparation of the bSUMs. M, marker; Load, KvAP used for reconstitution; unbound, the supernatant after the pelleting of reconstituted beads; Washes 1–5, the reconstituted beads were washed five times with a buffer containing 150 mM KCl and 10 mM HEPES, pH 7.4. Beads: 20 mM DM and 300 mM imidazole in the washing buffer were used to extract the KvAP protein from the bSUMs. The samples were assayed via Coomassie blue-stained SDS-PAGE. The arrow points to the band of KvAP.

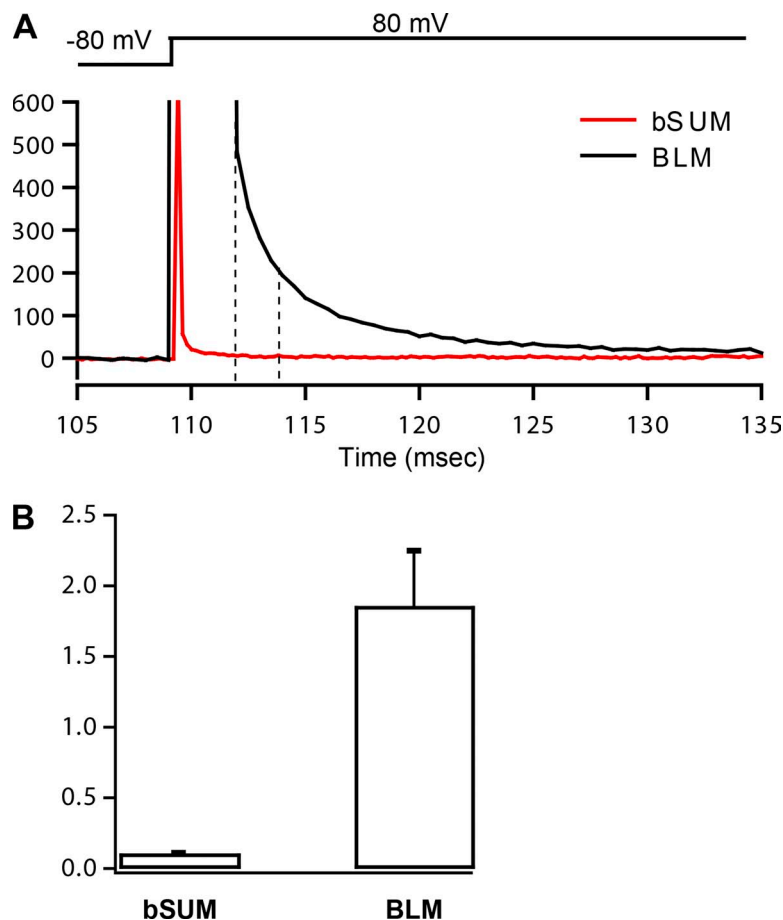

**Figure S2.** Clamp speed in the patch recordings of a bSUM appears much faster than that of a bilayer lipid membrane (BLM). (A) Current traces from the PE/PG membranes (red from the bSUM and black from the BLM) were triggered by test pulses from  $-80$  to  $80$  mV. In the cell-attach mode recording of the bSUM, capacitance compensation was tuned. Recordings of the BLM were made with the amplifier set in whole-cell mode. It was difficult to compensate for the BLM capacitance current using our amplifier. The traces were fitted with a single-exponential function, and the resultant time constants were used to estimate clamp speed. (B) Comparison of the kinetic results from various PE/PG membranes. Tau values are  $0.11 \pm 0.01$  ms for the bSUM and  $1.9 \pm 0.3$  ms for the BLM ( $n = 3$ ). The error bars represent standard deviations from three different measurements. The capacitance component of the BLM is  $\sim 20$ -fold slower than that of the bSUM.

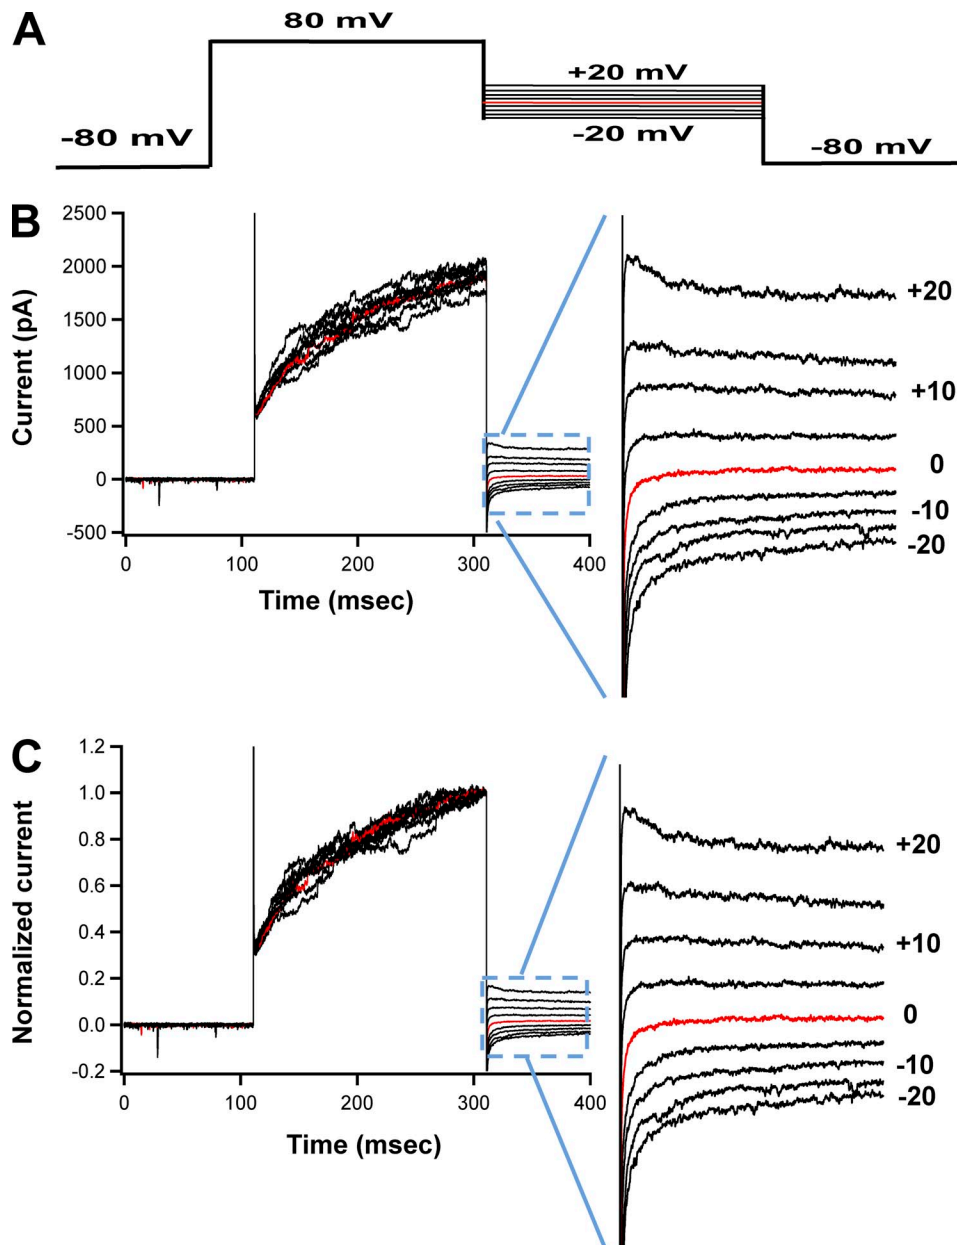

**Figure S3.** Analysis of tail currents to identify the reversal potential level. (A) The voltage-clamp pulses. The interval between pulses was  $60$  s, and the tail current segments varied from  $-20$  to  $20$  mV in  $5$ -mV steps. (B) Probably as a result of the slow kinetics of activation, the currents recorded from the same patch showed variations in the current size during the first  $200$ -ms activation phase of the  $80$ -mV segment. Even so, the tail currents clearly showed the change of ion flow from outward to inward around  $0$  mV (the red trace), suggesting that the reversal potential is around  $0$  mV. (C) To minimize the effect of the current variations in the activation segment, each current trace, after leak correction, was normalized against the current at the end of the  $200$ -ms activation at  $80$  mV. The tail currents before and after normalization were expanded to the right side in both B and C. The normalized currents were plotted as in Fig. 7 D, and a linear fitting of the points around the roughly estimated reversal potential was used to obtain a more accurate value for the measured reversal potential. The solutions used for the experiments had  $150$  mM KCl in the intracellular side and  $90$  mM KCl and  $60$  mM KF in the extracellular side, and the Nernst potential for potassium was  $0$  mV.
